# Supplementary material for: Validation of the Chinese version of the Mini Sarcopenia Risk Assessment questionnaire in community-dwelling older adults
Source: PubMed Central journal article supplement — Medicine (Baltimore). 2018 Sep 14;97(37):e12426. doi: 10.1097/MD.0000000000012426 (PMC6156061; doi:10.1097/md.0000000000012426), 2018-09-14
Supplement: medi-97-e12426-s001.pdf [file medi-97-e12426-s001.pdf]

Supplementary Table 1. 迷你肌少症风险评估量表中文版 (C-  
SMRA)

|                                      | C-MSRA-7<br>得分 | C-MSRA-5<br>得分 |
|--------------------------------------|----------------|----------------|
| 1. 您今年多大年龄啦？                         |                |                |
| ◇ ≥ 70 岁                             | 0              | 0              |
| ◇ < 70 岁                             | 5              | 5              |
| 2. 去年您是否住院治疗？                        |                |                |
| ◇ 是，且≥2次                             | 0              | 0              |
| ◇ 是，但仅1次                             | 5              | 10             |
| ◇ 没有                                 | 10             | 15             |
| 3. 您日常活动能力如何？                        |                |                |
| ◇ 我可以行走<1000米                        | 0              | 0              |
| ◇ 我可以行走≥1000米                        | 5              | 15             |
| 4. 您通常每天吃三顿饭吗？                       |                |                |
| ◇ 不，我经常（超过每周2次）不吃某顿饭（如：不吃早饭或晚餐只喝汤或茶） | 0              | 0              |
| ◇ 是                                  | 5              | 15             |
| 5. 您平时是否吃以下食物中的至少一种？                 |                |                |
| ◇ 牛奶或奶制品（如：酸奶），但不是每天吃                | 0              | -              |
| ◇ 牛奶或奶制品（如：酸奶），且至少每天1次               | 5              | -              |
| 6. 您平时是否吃以下食物中的至少一种？                 |                |                |
| ◇ 禽类，肉类，鱼，蛋，豆制品，蔬菜炖肉或火腿，但不是每天吃       | 0              | -              |
| ◇ 禽类，肉类，鱼，蛋，豆制品，蔬菜炖肉或火腿，且至少每天1次      | 5              | -              |
| 7. 您去年是否有体重下降？                       |                |                |
| ◇ 是，且体重下降>2公斤                        | 0              | 0              |
| ◇ 否；或者体重下降≤2公斤                       | 5              | 10             |

C-MSRA: Chinese version of the Mini Sarcopenia Risk Assessment

## Supplementary Table 2. The back-translated questionnaire of the

### Chinse version of MSRA

|                                                                                                        | 7 items<br>Score | 5 items<br>Score |
|--------------------------------------------------------------------------------------------------------|------------------|------------------|
| 1. How old are you ?                                                                                   |                  |                  |
| $\geq 70$ years                                                                                        | 0                | 0                |
| $< 70$ years                                                                                           | 5                | 5                |
| 2. Were you hospitalized in the last year?                                                             |                  |                  |
| Yes, and $\geq 2$ times                                                                                | 0                | 0                |
| Yes, but only one hospitalization                                                                      | 5                | 10               |
| No                                                                                                     | 10               | 15               |
| 3. What is your regular activity level?                                                                |                  |                  |
| I can walk $< 1000$ meters                                                                             | 0                | 0                |
| I can walk $\geq 1000$ meters                                                                          | 5                | 15               |
| 4. Do you eat three meals every day regularly?                                                         |                  |                  |
| No, up to twice per week I skip a meal (e.g., I skip breakfast or I have only tea or soup for dinner.) | 0                | 0                |
| Yes                                                                                                    | 5                | 15               |
| 5. Do you consume any of the following foods?                                                          |                  |                  |
| Milk or dairy products (e.g., yogurt), but not every day.                                              | 0                | -                |
| Milk or dairy products (e.g., yogurt), at least once per day.                                          | 5                | -                |
| 6. Do you consume any of the following foods?                                                          |                  |                  |
| Poultry, meat, fish, eggs, legumes, ragout or ham, but not every day                                   | 0                | -                |
| Poultry, meat, fish, eggs, legumes, ragout or ham, at least once per day                               | 5                | -                |
| 7. Did you lose weight in the last year?                                                               |                  |                  |
| Yes, and $> 2\text{kg}$                                                                                | 0                | 0                |
| No, or Yes, but $\leq 2\text{kg}$                                                                      | 5                | 10               |
